# Supplementary material for: Spatial Metagenomic Analysis in Understanding the Microbial Diversity of Thar Desert
Source: MDPI journal article supplement (doi:10.3390/biology11030461), 2022-03-17
Supplement: s1 [file s1]

**Table S1.** Site information and Sample type.

| <b>S.I. No.</b> | <b>Location</b>              | <b>Sample count</b> | <b>Latitude</b> | <b>Longitude</b> | <b>Zone</b> | <b>Elevation</b> | <b>Average Humidity</b> | <b>Average Precipitation</b> | <b>Average Temperature at sampling</b> |
|-----------------|------------------------------|---------------------|-----------------|------------------|-------------|------------------|-------------------------|------------------------------|----------------------------------------|
| <b>1.</b>       | Sihdar, Jaisalmer            | 6 (soil)            | 26.2154° N      | 70.6336° E       | Arid        | 224m             | 40%                     | 2mm                          | 55°C                                   |
| <b>2.</b>       | Lakh granite mine, Jaisalmer | 6 (soil)            | 26.15511 N      | 70.90740 E       | Arid        | 224m             | 50%                     | 6mm                          | 53°C                                   |
| <b>3.</b>       | Thumbli Coal Plant, Barmer   | 6 (soil)            | 26.2032° N      | 72.4791° E       | Arid        | 207m             | 53%                     | 2.5mm                        | 56°C                                   |
| <b>4.</b>       | Pachpdara lake, Barmer       | 6 (soil)            | 25.9351° N      | 72.2455° E       | Semi-Arid   | 102m             | 40%                     | 4mm                          | 55°C                                   |
| <b>5.</b>       | Khetolai, Jaisalmer          | 6 (soil)            | 27.0240714° N   | 71.7097069° E    | Semi-Arid   | 215m             | 65%                     | 0mm                          | 55°C                                   |
| <b>6.</b>       | Loharki, Jaisalmer           | 6 (water)           | 27.1475960° N   | 71.7649355° E    | Semi-Arid   | 238m             | 62%                     | 0.5mm                        | 56°C                                   |

**Table S2.** Soil profiling of soil and water samples

| <b>Samples</b> | <b>pH</b> | <b>EC</b><br>(dSm <sup>-1</sup> ) | <b>OC</b><br>(g kg <sup>-1</sup> ) | <b>TP</b><br>(g kg <sup>-1</sup> ) | <b>K</b><br>(g kg <sup>-1</sup> ) | <b>Zn</b><br>(ppm) | <b>Fe</b><br>(ppm) | <b>Cu</b><br>(ppm) | <b>Mn</b><br>(ppm) |
|----------------|-----------|-----------------------------------|------------------------------------|------------------------------------|-----------------------------------|--------------------|--------------------|--------------------|--------------------|
| <b>1.</b>      | 8.45      | 0-09                              | 0.16                               | 30                                 | 230                               | 0.48               | 3.84               | 0.22               | 2.18               |
| <b>2.</b>      | 8.08      | 0-81                              | 0.18                               | 32                                 | 245                               | 0.52               | 4.64               | 0.18               | 3.24               |
| <b>3.</b>      | 7.72      | 1-96                              | 0.19                               | 28                                 | 182                               | 0.76               | 5.25               | 0.16               | 2.98               |
| <b>4.</b>      | 9.05      | 13.89                             | 0.26                               | 32                                 | 200                               | 0.36               | 5.24               | 0.28               | 2.14               |
| <b>5.</b>      | 8.36      | 0.23                              | 0.18                               | 40                                 | 350                               | 0.46               | 4.32               | 0.72               | 2.34               |
| <b>6.</b>      | 8.22      | 0.72                              | 7.00<br>ppm                        | 0.001<br>mg/ml                     | 245                               | 0.62               | 0.19               | 2.32               | 0.09               |

**Table S3.** Library quantity estimate using Qubit HS kit

| <b>S. No.</b> | <b>Sample ID</b> | <b>Qubit conc. (ng/ µl)</b> | <b>QC status</b> |
|---------------|------------------|-----------------------------|------------------|
| <b>1</b>      | Sample 1         | 110                         | passed           |
| <b>2</b>      | Sample 2         | 120                         | passed           |
| <b>3</b>      | Sample 3         | 114                         | passed           |
| <b>4</b>      | Sample 4         | 108                         | passed           |
| <b>5</b>      | Sample 5         | 114                         | passed           |
| <b>6</b>      | Sample 6         | 102                         | Passed           |

**Table S4.** Summary of Raw sequence data and quality

| <b>Sample-ID</b> | <b>Number of reads</b> | <b>Read Length</b> | <b>GC%</b> | <b>% Bases &gt; Q20</b> |
|------------------|------------------------|--------------------|------------|-------------------------|
| <b>Sample-1</b>  | 185546                 | 301                | 57.5       | 98.71                   |
| <b>Sample-2</b>  | 210502                 | 301                | 53.5       | 98.58                   |
| <b>Sample-3</b>  | 203750                 | 301                | 56         | 98.78                   |
| <b>Sample-4</b>  | 150900                 | 301                | 57         | 98.21                   |
| <b>Sample-5</b>  | 151590                 | 301                | 57         | 98.47                   |
| <b>Sample-6</b>  | 459788                 | 301                | 50         | 98.51                   |

**Table S5.** Top 10 OTU's abundance among the samples

| Phylum                 | Class               | Order                         | Family                           | Genus                            | 1    | 2   | 3    | 4   | 5   | 6    |
|------------------------|---------------------|-------------------------------|----------------------------------|----------------------------------|------|-----|------|-----|-----|------|
| <b>Proteobacteria</b>  | Alphaproteobacteria | -                             | -                                | -                                | 558  | 356 | 1050 | 630 | 697 | 298  |
| <b>Planctomycetes</b>  | Planctomycetacia    | Gemmatales                    | Gemmataceae                      | uncultured                       | 1303 | 65  | 155  | 230 | 682 | 341  |
| <b>Actinobacteria</b>  | Actinobacteria      | -                             | -                                | -                                | 699  | 481 | 647  | 255 | 615 | 55   |
| <b>Proteobacteria</b>  | Gammaproteobacteria | Betaproteo bacteriales        | Burkholderiaceae                 | Curvibacter                      | 0    | 0   | 1    | 0   | 0   | 2378 |
| <b>Patescibacteria</b> | Parcubacteria       | Candidatus_<br>Kaiserbacteria | Candidatus_<br>Kaiserbacteria_fa | Candidatus_Kaiserbacteria_<br>ge | 11   | 17  | 138  | 52  | 15  | 2136 |
| <b>Chlamydiae</b>      | Chlamydiae          | Chlamydiales                  | cvE6                             | cvE6_ge                          | 0    | 0   | 2    | 0   | 0   | 2320 |
| <b>Planctomycetes</b>  | Phycisphaerae       | Tepidisphaerales              | WD2101_soil_group                | WD2101_soil_group_ge             | 653  | 104 | 639  | 148 | 665 | 45   |
| <b>Chloroflexi</b>     | Chloroflexia        | Chloroflexales                | Roseiflexaceae                   | uncultured                       | 963  | 28  | 437  | 240 | 460 | 50   |
| <b>Actinobacteria</b>  | -                   | -                             | -                                | -                                | 649  | 275 | 476  | 179 | 489 | 26   |
| <b>Proteobacteria</b>  | Alphaproteobacteria | Rhizobiales                   | Beijerinckiaceae                 | Microvirga                       | 599  | 234 | 591  | 184 | 420 | 32   |

**Table S6.** Top 10 Phyla abundance among the samples

| <b>Phylum</b>          | <b>Sample-1</b> | <b>Sample-2</b> | <b>Sample-3</b> | <b>Sample-4</b> | <b>Sample-5</b> | <b>Sample-6</b> |
|------------------------|-----------------|-----------------|-----------------|-----------------|-----------------|-----------------|
| <b>Proteobacteria</b>  | 5789            | 4850            | 7368            | 3615            | 4828            | 8764            |
| <b>Actinobacteria</b>  | 5544            | 5365            | 4916            | 1918            | 3990            | 876             |
| <b>Planctomycetes</b>  | 3547            | 1442            | 2398            | 1309            | 3062            | 1489            |
| <b>Chloroflexi</b>     | 2735            | 3064            | 3088            | 1034            | 2441            | 463             |
| <b>Bacteroidetes</b>   | 1454            | 1677            | 813             | 1509            | 1021            | 3260            |
| <b>Euryarchaeota</b>   | 870             | 139             | 1107            | 4836            | 1097            | 277             |
| <b>Firmicutes</b>      | 2221            | 1281            | 1448            | 686             | 771             | 1844            |
| <b>Patescibacteria</b> | 162             | 178             | 1227            | 315             | 323             | 2896            |
| <b>Acidobacteria</b>   | 895             | 219             | 648             | 296             | 944             | 365             |
| <b>Chlamydiae</b>      | 42              | 17              | 36              | 17              | 43              | 2453            |
